# Supplementary material for: Epigenetic effects of casein-derived opioid peptides in SH-SY5Y human neuroblastoma cells
Source: PubMed Central journal article supplement (PMC4673759; doi:10.1186/s12986-015-0050-1), 2015-12-09
Supplement: 12986_2015_50_MOESM1_ESM.pdf [file 12986_2015_50_MOESM1_ESM.pdf]

|    | Probe                                                        |
|----|--------------------------------------------------------------|
| 1  | Late cornified envelope 1E                                   |
| 2  | Hypothetical gene LOC145837                                  |
| 3  | Apoptosis inhibitor                                          |
| 4  | Mitochondrial transcription termination factor               |
| 5  | UDP glycosyltransferase 3 family, polypeptide A1             |
| 6  | CD300e molecule                                              |
| 7  | Hypothetical protein LOC731220                               |
| 8  | Ankyrin repeat and FYVE domain containing 1                  |
| 9  | Wingless-type MMTV integration site family, member 7B        |
| 10 | Ankyrin repeat domain 13B                                    |
| 11 | Syntaxin binding protein 6 (amisyn)                          |
| 12 | Cystatin 11                                                  |
| 13 | Late cornified envelope 1D                                   |
| 14 | CDNA clone IMAGE:4830065                                     |
| 15 | Olfactory receptor, family 51, subfamily I, member 2         |
| 16 | Hypothetical protein LOC100131894                            |
| 17 | Keratin associated protein 3-1                               |
| 18 | Fibroblast growth factor 4                                   |
| 19 | SLIT-ROBO Rho GTPase activating protein 2 pseudogene 1       |
| 20 | Tripartite motif-containing 58                               |
| 21 | Follicle stimulation hormone receptor                        |
| 22 | Caveolin 1, caveolae protein, 22kDa                          |
| 23 | Transcribed locus                                            |
| 24 | CDNA FI_J34636 fis, clone KIDNE2016101                       |
| 25 | Transcribed locus                                            |
| 26 | Cas scaffolding protein family member 4                      |
| 27 | SHQ1 homolog ( <i>S. cerevisiae</i> )                        |
| 28 | Inter-alpha (globulin) inhibitor H3                          |
| 29 | COBW domain containing 1                                     |
| 30 | DEAD (Asp-Glu-Ala-Asp) box polypeptide 6                     |
| 31 | Carboxymethylenebutenolidase homolog ( <i>Pseudomonas</i> )  |
| 32 | Integrin, alpha 5 (fibronectin receptor, alpha polypeptide)  |
| 33 | Homo sapiens, clone IMAGE:5195119, mRNA                      |
| 34 | N-acetyltransferase 8 (GCN5-related, putative)               |
| 35 | Gastrin-releasing peptide receptor                           |
| 36 | Melanoma antigen family E, 2                                 |
| 37 | Secernin 3                                                   |
| 38 | Coagulation factor XIII, A1 polypeptide                      |
| 39 | Fc receptor-like 5                                           |
| 40 | Hypothetical protein LOC65998                                |
| 41 | Phospholipase A2, group IVC (cytosolic, calcium-independent) |
| 42 | Tight junction protein 3 (zona occludens 3)                  |
| 43 | Transcribed locus                                            |
| 44 | Major histocompatibility complex, class I, B                 |
| 45 | Cathepsin E                                                  |
| 46 | Uromodulin                                                   |
| 47 | Lymphocyte antigen 6 complex, locus G6D                      |
| 48 | Glutathione S-transferase alpha 3                            |
| 49 | Torsin A interacting protein 1                               |
| 50 | High mobility group AT-hook 2                                |

**Supplemental Table 1.** List of 50 differentially transcribed probes from heat maps used in figure 2.
