# Supplementary material for: Epigenetic effects of casein-derived opioid peptides in SH-SY5Y human neuroblastoma cells
Source: PubMed Central journal article supplement (PMC4673759; doi:10.1186/s12986-015-0050-1), 2015-12-09
Supplement: 12986_2015_50_MOESM2_ESM.pdf [file 12986_2015_50_MOESM2_ESM.pdf]

| Methylation                            |                     |        |
|----------------------------------------|---------------------|--------|
| Disease or Disorder                    | P-value Ranges      | Probes |
| Morphine                               |                     |        |
| Cancer                                 | 8.28E-24 - 1.10E-02 | 3020   |
| Gastrointestinal Disease               | 9.34E-08 - 1.07E-02 | 1682   |
| Reproductive System Disease            | 1.59E-06 - 6.94E-03 | 747    |
| Inflammatory Response                  | 5.46E-05 - 1.07E-02 | 435    |
| Respiratory Disease                    | 5.61E-05 - 1.10E-02 | 354    |
| hBCM7                                  |                     |        |
| Cancer                                 | 4.50E-25 - 8.75E-03 | 1770   |
| Gastrointestinal Disease               | 1.09E-12 - 7.32E-03 | 1212   |
| Metabolic Disease                      | 7.24E-06 - 5.57E-03 | 312    |
| Reproductive System Disease            | 2.33E-05 - 5.43E-03 | 417    |
| Endocrine System Disorders             | 6.01E-05 - 5.43E-03 | 390    |
| bBCM7                                  |                     |        |
| Neurological Disease                   | 3.40E-03 - 4.07E-02 | 14     |
| Organismal Injury and Abnormalities    | 3.40E-03 - 3.82E-02 | 11     |
| Connective Tissue Disorders            | 3.96E-03 - 4.07E-02 | 6      |
| Dermatological Diseases and Conditions | 3.96E-03 - 4.51E-02 | 10     |
| Inflammatory Disease                   | 3.96E-03 - 4.51E-02 | 9      |
| Transcription                          |                     |        |
| Disease or Disorder                    | P-value Ranges      | Probes |
| Morphine                               |                     |        |
| Inflammatory Response                  | 1.33E-12 - 1.35E-03 | 274    |
| Connective Tissue Disorders            | 4.06E-08 - 1.33E-03 | 171    |
| Inflammatory Disease                   | 4.06E-08 - 1.33E-03 | 223    |
| Skeletal and Muscular Disorders        | 4.06E-08 - 1.33E-03 | 174    |
| Nutritional Disease                    | 3.19E-07 - 3.59E-04 | 88     |
| hBCM7                                  |                     |        |
| Developmental Disorder                 | 3.52E-05 - 1.14E-02 | 28     |
| Cardiovascular Disease                 | 4.61E-05 - 1.14E-02 | 23     |
| Skeletal and Muscular Disorders        | 6.28E-05 - 1.14E-02 | 37     |
| Cancer                                 | 6.95E-05 - 1.14E-02 | 69     |
| Organismal Injury and Abnormalities    | 6.95E-05 - 1.14E-02 | 33     |
| bBCM7                                  |                     |        |
| Cancer                                 | 1.27E-04 - 3.28E-02 | 185    |
| Reproductive System Disease            | 1.27E-04 - 3.01E-02 | 19     |
| Endocrine System Disorders             | 2.03E-04 - 3.28E-02 | 22     |
| Organismal Injury and Abnormalities    | 3.03E-04 - 3.28E-02 | 51     |
| Infectious Disease                     | 1.08E-03 - 3.28E-02 | 18     |

**Supplemental Table 2.** Diseases and disorders generated by IPA analysis of DMTs and DETs corresponding to treatment. The p-value range listed represents the range of significant ( $P < 0.05$ ) pathways associated with the listed disease or disorder. The number of probes indicates the number of differentially methylated or transcribed transcripts associated with the disease or disorder.
